# Supplementary material for: Antioxidant Effects of Aromatic Plant Extracts in Neurodegenerative Diseases: A Review
Source: Preprints.org preprint supplement (doi:10.20944/preprints202409.1667.v1), 2024-09-20
Supplement: Supplementary file 1 [file supplementary]

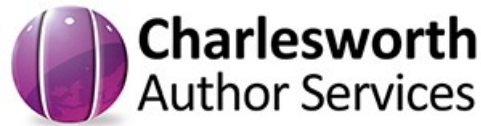

# EDITORIAL CERTIFICATE

This document certifies that the manuscript below was edited for correct English language usage, grammar, punctuation and spelling by qualified native English speaking editors at Charlesworth Author Services.

## **Paper Title:**

Antioxidant effects of aromatic plant extracts in neurodegenerative diseases: A review

## **Author:**

冬冬 秦

## **Date certificate issued:**

September 13, 2024

[cwauthors.com](http://cwauthors.com)
